# Supplementary material
Source: PubMed Central journal article supplement (PMC6444933)
Supplement: NIHMS942580-supplement-Supplementary_Table_1___Loci_for_immigrans_group_phylogeny.pdf [file NIHMS942580-supplement-Supplementary_Table_1___Loci_for_immigrans_group_phylogeny.pdf]

| Supplementary Table 1 |                                                                                             |                  |                         |                     |                     |                                                                                                                   |                     |                         |                      |                                   |                  |                         |
|-----------------------|---------------------------------------------------------------------------------------------|------------------|-------------------------|---------------------|---------------------|-------------------------------------------------------------------------------------------------------------------|---------------------|-------------------------|----------------------|-----------------------------------|------------------|-------------------------|
| Gene                  | <i>D. albomicans</i>                                                                        | <i>D. nasuta</i> | <i>D. sulfurigaster</i> | <i>D. kepulauan</i> | <i>D. formosana</i> | <i>D. immigrans</i>                                                                                               | <i>D. ruberrima</i> | <i>D. neohypocausta</i> | <i>D. hypocausta</i> | <i>D. siamana</i>                 | <i>D. rubida</i> | <i>D. quadrilineata</i> |
| <b>Adh</b>            | <i>D. albomicans</i> genome<br>Muller B: 30540143..30539286<br>Muller B: 30525309..30524452 | AB261137         | AY044127                | MG684381            | AY044130            | <i>D. immigrans</i> genome<br>scaffold 4046076: 1789..2627                                                        | AY044128            | AY044129                | AY044131             | AB261135<br>AY044125*<br>MG684383 | MG684382         | AB261130                |
| <b>Amyrel</b>         | <i>D. albomicans</i> genome<br>Muller C: 23272956..23271173                                 | AY733059         | AY736508                | AY733044            | AF462601            | <i>D. immigrans</i> genome<br>scaffold 4050206: 22044..23668                                                      | AY736501            | MG684384                | AY733043             | AY736504                          | AY736502         | MG684385                |
| <b>Ddc</b>            | <i>D. albomicans</i> genome<br>scaffold_85566: 539662..538999                               | MG684389         | MG684395                | MG684388            | MG684386            | <i>D. immigrans</i> genome<br>scaffold 4045818: 814..1491                                                         | MG684392            | MG684390                | MG684387             | MG684394                          | MG684393         | MG684391                |
| <b>esc</b>            | <i>D. albomicans</i> genome<br>Muller B: 9774951..9775386                                   | MG684399         | MG684405                | MG684398            | MG684396            | <i>D. immigrans</i> genome<br>scaffold 3987296: 311..745                                                          | MG684402            | MG684400                | MG684397             | MG684404                          | MG684403         | MG684401                |
| <b>GapDH</b>          | <i>D. albomicans</i> genome<br>scaffold_26721: 18305..17336                                 | AB261149         | MG684408                | MG684406            | AB261143            | <i>D. immigrans</i> genome<br>scaffold 4024724: 181..1337                                                         | AB261144            | AB261146                | AB261145             | AB261147                          | MG684407         | AB261153                |
| <b>ksr</b>            | <i>D. albomicans</i> genome<br>Muller E: 1289000..1289456                                   | MG684412         | MG684418                | MG684411            | MG684409            | <i>D. immigrans</i> genome<br>scaffold 4021374: 804..348                                                          | MG684415            | MG684413                | MG684410             | MG684417                          | MG684416         | MG684414                |
| <b>Pgi</b>            | <i>D. albomicans</i> genome<br>Muller C: 20433700..20434836                                 | MG684422         | MG684428                | MG684421            | MG684419            | <i>D. immigrans</i> genome<br>scaffold 4048178: 6646..7209                                                        | MG684425            | MG684423                | MG684420             | MG684427                          | MG684426         | MG684424                |
| <b>Tpi</b>            | <i>D. albomicans</i> genome<br>Muller E: 28274760..28275449<br>Muller E: 28317986..28318600 | MG684432         | MG684438                | MG684431            | MG684429            | <i>D. immigrans</i> genome<br>scaffold 3965563: 498.. 640<br>scaffold 3810568: 277..1<br>scaffold 3945882: 1..226 | MG684435            | MG684433                | MG684430             | MG684437                          | MG684436         | MG684434                |
| <b>Xdh</b>            | <i>D. albomicans</i> genome<br>Muller E: 4837990..4838643                                   | MG684442         | MG684448                | MG684441            | MG684439            | <i>D. immigrans</i> genome<br>scaffold 4050282: 8579.. 9232                                                       | MG684445            | MG684443                | MG684440             | MG684447                          | MG684446         | MG684444                |

\* See Materials and Methods
