# Supplementary material
Source: PubMed Central journal article supplement (PMC6444933)
Supplement: NIHMS942580-supplement-Supplementary_Table_2___Primers_for_immigrans_group_phylogeny.pdf [file NIHMS942580-supplement-Supplementary_Table_2___Primers_for_immigrans_group_phylogeny.pdf]

**Supplementary Table 2**

| <b>Gene</b>   | <b>Forward primer sequence</b> | <b>Reverse primer sequence</b> | <b>Alignment length (Coding)</b> |
|---------------|--------------------------------|--------------------------------|----------------------------------|
| <i>Adh</i>    | GCNNGNNTGGGNGGNATTG            | GGACCCCGTCAACTGGACCAAG         | 672                              |
| <i>Amyrel</i> | GTAATNGGNCCACGCGAAG            | GCATTTGTACCGTTTGTGTCGTTATCG    | 1488                             |
| <i>Ddc</i>    | AGNCCAAGTNCATGCCTANNTTCC       | ACCCAGCTGGGNTCCTTNAGCCACAT     | 669                              |
| <i>esc</i>    | CCGGATGAGGTHTTYTACACCTG        | TCNNGRAARTGYTTGGTMAYYGTTGGG    | 434                              |
| <i>Gpdh</i>   | GTTCTAGATCTGGTTGAGGCTGCCAAGAA  | ACATATGCTCTAGATGATTGCGTATGCA   | 744                              |
| <i>ksr</i>    | CAGGAYATGATTGAWCTCTCKGC        | CCCASGAGTCCCAGTGCCAYTGNTC      | 473                              |
| <i>Pgi</i>    | AACGAGTTGATRTCCCAAATGATKCC     | CAGGAGACCATYACGAACGCCAC        | 772                              |
| <i>Tpi</i>    | TCTTGCCAGYTCCTTGGCRTTGGC       | GTKGGWGGCAACTGGAAGATGAA        | 625                              |
| <i>Xdh</i>    | GCGCCSGGTGGCATGATHGCCTATCG     | GCCTNCKYSACRTYRCCTTG           | 653                              |
